# Supplementary material
Source: MDPI journal article supplement (https://www.mdpi.com/2410-3888/9/2/76)
Supplement: s1 [file s1]

Supplementary Table.

**Table S1.** Ingredients and chemical composition of the basal diet (dry weight, %).

| <b>Ingredients</b>                             | <b>%</b> |
|------------------------------------------------|----------|
| Fish meal (65%)                                | 9        |
| Soybean meal (46%)                             | 36.85    |
| Corn gluten (60%)                              | 12.2     |
| Yellow corn                                    | 19.25    |
| Wheat bran                                     | 5.7      |
| Fish oil                                       | 6.00     |
| Starch                                         | 7.00     |
| Mineral premix (without se)                    | 2.00     |
| Vitamin premix                                 | 2.00     |
| Total                                          | 100      |
| <b>Proximate composition % dry matter (DM)</b> | <b>%</b> |
| Crude protein (CP)                             | 30       |
| Crude fiber (CF)                               | 4.8      |
| Ash                                            | 8.2      |
| Ether extract (EE)                             | 6.5      |
| *Nitrogen-free extract (NFE)                   | 50.5     |

\*NFE = 100 - (CP% + EE% + CF% + Ash%).
